# Supplementary material for: Transcription Factor ANAC074 Binds to NRS1, NRS2, or MybSt1 Element in Addition to the NACRS to Regulate Gene Expression
Source: PubMed Central journal article supplement (PMC6214087; doi:10.3390/ijms19103271), 2018-10-21
Supplement: ijms-19-03271-s001.pdf [file ijms-19-03271-s001.pdf]

## Supplemental Table S1

Sequences of oligonucleotide primers used in this study.

| Primer names    | Primers sequences (5'-3')                                   |
|-----------------|-------------------------------------------------------------|
| pHIS2-NRS1-D0-F | 5'-AATTCCTTAGTTTCGGGCCCTTAGTTTCGGGCCCTTAGTTTCGGGGAGCT-3'    |
| pHIS2-NRS1-D0-R | 5'-CCCCGAAACTAAGGGCCCGAAACTAAGGGCCCGAAACTAAGGGG-3'          |
| pHIS2-NRS1-D1-F | 5'-AATTCCTTAGTTTCGGCCTTAGTTTCGGCCTTAGTTTCGGGA GCT-3'        |
| pHIS2-NRS1-D1-R | 5'-CCCTTAGTTTCGGCCTTAGTTTCGGCCTTAGTTTCGGG-3'                |
| pHIS2-NRS1-D2-F | 5'-AATTCCTTAGTTTCGCTTAGTTTCGCTTAGTTTCGGAGCT-3'              |
| pHIS2-NRS1-D2-R | 5'-CCTTAGTTTCGCTTAGTTTCGCTTAGTTTCGG-3'                      |
| pHIS2-NRS1-D3-F | 5'-AATTCCTTAGTTTCTTAGTTTCTTAGTTTCGAGCT-3'                   |
| pHIS2-NRS1-D3-R | 5'-CGAAACTAAGAACTAAGAACTAA-3'                               |
| pHIS2-NRS1-D4-F | 5'-AATTCCTAGTTTCTTAGTTTCTTAGTTTGAGCT-3'                     |
| pHIS2-NRS1-D4-R | 5'-CAAATAAACTAAACTAG-3'                                     |
| pHIS2-NRS1-D5-F | 5'-AATTCAGTTTCTTAGTTTCTTAGTTTGAGCT-3'                       |
| pHIS2-NRS1-D5-R | 5'-CAAATAAACTAAACTG-3'                                      |
| pHIS2-NRS1-D6-F | 5'-AATTCCTAGTTTCTTAGTTTCTTAGTTTGAGCT-3'                     |
| pHIS2-NRS1-D6-R | 5'-CAATAAACTAAACTAG-3'                                      |
| pHIS2-NRS1-D7-F | 5'-AATTCAGTTAGTTAGTTGAGCT-3'                                |
| pHIS2-NRS1-D7-R | 5'-CAATAAACTAAACTG-3'                                       |
| pHIS2-NRS1-D8-F | 5'-AATTCCTAGTTAGTTAGTTGAGCT-3'                              |
| pHIS2-NRS1-D8-R | 5'-CAATAAACTAAACTAG-3'                                      |
| pHIS2-NRS2-D0-F | 5'-AATTCCTGAAATCTCGGGCCCTGAAATCTCGGGCCCTGAAATCTCGGGGAGCT-3' |
| pHIS2-NRS2-D0-R | 5'-CCCCGAGATTCAGGGCCCGAGATTCAGGGCCCGAGATTCAGGGG-3'          |

---

|                 |                                                          |
|-----------------|----------------------------------------------------------|
| pHIS2-NRS2-D1-F | 5'-AATTCCCTGAATCTCGGCCTGAATCTCGGCCTGAATCTCGGG<br>AGCT-3' |
| pHIS2-NRS2-D1-R | 5'-CCCGAGATTCAGGCCGAGATTCAGGCCGAGATTCAGGG-3'             |
| pHIS2-NRS2-D2-F | 5'-AATTCCTGAATCTCGCTGAATCTCGCTGAATCTCGGAGCT-3'           |
| pHIS2-NRS2-D2-R | 5'-CCGAGATTCAGCGAGATTCAGCGAGATTCAGG-3'                   |
| pHIS2-NRS2-D3-F | 5'-AATTCTGAATCTCTGAATCTCTGAATCTCGAGCT-3'                 |
| pHIS2-NRS2-D3-R | 5'-CGAGATTCAGAGATTCAGAGATTCAG-3'                         |
| pHIS2-NRS2-D4-F | 5'-AATTCGAATCTGAATCTGAATCTGAGCT-3'                       |
| pHIS2-NRS2-D4-R | 5'-CAGATTCAGATTCAGATTCG-3'                               |
| pHIS2-NRS2-D5-F | 5'-AATTCAATCAATCAATCGAGCT-3'                             |
| pHIS2-NRS2-D5-R | 5'-CGATTGATTGATTG-3'                                     |
| pHIS2-NRS2-D6-F | 5'-AATTCGAATCGAATCGAATCGAGCT-3'                          |
| pHIS2-NRS2-D6-R | 5'-CGATTCGATTCGATTCG-3'                                  |
| pHIS2-NRS2-D7-F | 5'-AATTCAATCTAATCTAATCTGAGCT-3'                          |
| pHIS2-NRS2-D7-R | 5'-CAGATTAGATTAGATTG-3'                                  |
| pHIS2-NRS2-D8-F | 5'-AATTCGAATGAATGAATGAGCT-3'                             |
| pHIS2-NRS2-D8-R | 5'-CATTCAATCATTG-3'                                      |
| pHIS2-NRS1-M1-F | 5'-AATTCGCGTTGCGTTGCGTTGAGCT-3'                          |
| pHIS2-NRS1-M1-R | 5'-CAACGCAACGCAACGCG-3'                                  |
| pHIS2-NRS1-M2-F | 5'-AATTCTAGGGTAGGGTAGGGGAGCT-3'                          |
| pHIS2-NRS1-M2-R | 5'-CCCCTACCCTACCCTAG-3'                                  |
| pHIS2-NRS1-M3-F | 5'-AATTCGGGGGGGGGGGGGGGGGAGCT-3'                         |
| pHIS2-NRS1-M3-R | 5'-CCCCCCCCCCCCCCCCG-3'                                  |
| pHIS2-NRS2-M1-F | 5'-AATTCTCATCTCATCTCATCGAGCT-3'                          |
| pHIS2-NRS2-M1-R | 5'-CGATGAGATGAGATGAG-3'                                  |

---

---

|                 |                                                                                   |
|-----------------|-----------------------------------------------------------------------------------|
| pHIS2-NRS2-M2-F | 5'-AATTCGACGCGACGCGACGCGAGCT-3'                                                   |
| pHIS2-NRS2-M2-R | 5'-CGCGTCGCGTCGCGTTCG-3'                                                          |
| pHIS2-NRS2-M3-F | 5'-AATTCTCCGATCCGATCCGAGAGCT-3'                                                   |
| pHIS2-NRS2-M3-R | 5'-CTCGGATCGGATCGGAG-3'                                                           |
| pHIS2-MYB-F     | 5'-AATTCGGATAGGATAGGATAGAGCT-3'                                                   |
| pHIS2-MYB-R     | 5'-CTATCCTATCCTATCCG-3'                                                           |
| pHIS2-MYB-M1-F  | 5'-AATTCTTATATTATATTATAGAGCT-3'                                                   |
| pHIS2-MYB-M1-R  | 5'-CTATAATATAATATAAG-3'                                                           |
| pHIS2-MYB-M2-F  | 5'-AATTCGTCGAGTCGAGTCGAGAGCT-3'                                                   |
| pHIS2-MYB-M2-R  | 5'-CTCGACTCGACTCGACG-3'                                                           |
| pHIS2-MYB-M3-F  | 5'-AATTCTTCGCTTCGCTTCGCGAGCT-3'                                                   |
| pHIS2-MYB-M3-R  | 5'-CGCGAAGCGAAGCGAAG-3'                                                           |
| pCAM-NRS1-F     | 5'-AGCTTTAGTTTAGTTTAGTTACCCTTCCTCTATATAAGGAAGT<br>TCATTTCAATTTGGAGAGAACACGGC-3'   |
| pCAM-NRS1-R     | 5'-CATGGCCGTGTTCTCTCCAAATGAAATGAACTTCCTTATATAG<br>AGGAAGGGTAACTAACTAACTAA-3'      |
| pCAM-NRS1-M3-F  | 5'-AGCTTGCTGGGCTGGGCTGGACCCTTCCTCTATATAAGGAAG<br>TTCATTTCAATTTGGAGAGAACACGGC-3'   |
| pCAM-NRS1-M3-R  | 5'-CATGGCCGTGTTCTCTCCAAATGAAATGAACTTCCTTATATAG<br>AGGAAGGGTCCAGCCCAGCCCAGC-A-3'   |
| pCAM-NRS2-F     | 5'-AGCTTGAATCGAATCGAATCACCTTCCTCTATATAAGGAAGT<br>TCATTTCAATTTGGAGAGAACACGGC-3'    |
| pCAM-NRS2-R     | 5'-CATGGCCGTGTTCTCTCCAAATGAAATGAACTTCCTTATATAG<br>AGGAAGGGT-GATTTCGATTTCGATTCA-3' |
| pCAM-NRS2-M3-F  | 5'-AGCTTTCCGATCCGATCCGAACCCTTCCTCTATATAAGGAAGT<br>TCATTTCAATTTGGAGAGAACACGGC-3'   |
| pCAM-NRS2-M3-R  | 5'-CATGGCCGTGTTCTCTCCAAATGAAATGAACTTCCTTATATAG<br>AGGAAGGGT-TCGGATCGGATCGGAA-3'   |
| pCAM-MYB-F      | 5'-AGCTTGGATAGGATAGGATAACCCTTCCTCTATATAAGGAAGT<br>TCATTTCAATTTGGAGAGAACACGGC-3'   |
| pCAM-MYB-R      | 5'-CATGGCCGTGTTCTCTCCAAATGAAATGAACTTCCTTATATAG<br>AGGAAGGGT-TATCCTATCCTATCCA-3'   |
| pCAM-MYB-M3-F   | 5'-AGCTTTTCGCTTCGCTTCGCACCCTTCCTCTATATAAGGAAGT<br>TCATTTCAATTTGGAGAGAACACGGC-3'   |

---

---

|                |                                                                                          |
|----------------|------------------------------------------------------------------------------------------|
| pCAM-MYB-M3-R  | 5'-CATGGCCGTGTTCTCTCCAAATGAAATGAACTTCCTTATATAG<br>AGGAAGGGTGC GAAGCGAAGCGAAA-3'          |
| pROK-ANAC074-F | 5'-CACGGGTACCATGGGTTTGAAAGATATTGG-3'                                                     |
| pROK-ANAC074-R | 5'-CCCGAGCTCTCATTGGAAAGCGAGGATATTTTC-3'                                                  |
| pHIS2-NRS1p+-F | 5'-ATCGGAATTCTAGTTTAGCTCACATGACGGGG-3'                                                   |
| pHIS2-NRS1p+-R | 5'-ACCGAGCTCAACTACAAATATATATTATGAC-3'                                                    |
| pHIS2-NRS1p--F | 5'-ATCGGAATTCTAGCTCACATGACGGGGTTTTT-3'                                                   |
| pHIS2-NRS1p--R | 5'-ACCGAGCTCCAAATATATATTATGACTCCTTA-3'                                                   |
| pHIS2-NRS1pm-F | 5'-ATCGGAATTCGCTGGTAGCTCACATGACGGGGTTTTT-3'                                              |
| pHIS2-NRS1pm-R | 5'-ACCGAGCTCCCAGCCAAATATATATTATGACTCCTTA-3'                                              |
| pHIS2-NRS2p+-F | 5'-ATCGGAATTCGAATCTAAGGGAGACTGTTCTTAC-3'                                                 |
| pHIS2-NRS2p+-R | 5'-ACCGAGCTCGATTCGTAGAAGAAGAAAGGTG-3'                                                    |
| pHIS2-NRS2p--F | 5'-ATCGGAATTCTAAGGGAGACTGTTCTTACACAAG-3'                                                 |
| pHIS2-NRS2p--R | 5'-ACCGAGCTCGTAGAAGAAGAAAGGTGGAACC-3'                                                    |
| pHIS2-NRS2pm-F | 5'-ATCGGAATTCTCCGAAAGGGAGACTGTTCTTAC-3'                                                  |
| pHIS2-NRS2pm-R | 5'-ACCGAGCTCTCGGAGTAGAAGAAGAAAGGTG-3'                                                    |
| pHIS2-MYBp+-F  | 5'-ATCGGAATTCGGATATTTTTTTTTTGTTCATCGTG-3'                                                |
| pHIS2-MYBp+-R  | 5'-ACCGAGCTCTATCCGTTCAAATTATAGAACATG-3'                                                  |
| pHIS2-MYBp--F  | 5'-ATCGGAATTCTTTTTTTTTTGTTCATCGTGACGATA-3'                                               |
| pHIS2-MYBp--R  | 5'-ACCGAGCTCGTTCAAATTATAGAACATGCG-3'                                                     |
| pHIS2-MYBpm-F  | 5'-ATCGGAATTCTTCGCTTTTTTTTTTGTTCATCGTG-3'                                                |
| pHIS2-MYBpm-R  | 5'-ACCGAGCTCGCGAAGTTCAAATTATAGAACATG-3'                                                  |
| pCAM-NRS1p+-F  | 5'-ATCGAAGCTTAGTTTAGCTCACATGACGGGG-3'                                                    |
| pCAM-NRS1p+-R  | 5'-ACCCCATGGCCGTGTTCTCTCCAAATGAAATGAACTTCCTTAT<br>ATAGAGGAAGGGTAACTACAAATATATATTATGAC-3' |
| pCAM-NRS1p--F  | 5'-ATCGAAGCTTTAGCTCACATGACGGGGTTTTTTT-3'                                                 |

---

---

|                   |                                                                                                       |
|-------------------|-------------------------------------------------------------------------------------------------------|
| pCAM-NRS1p--R     | 5'-ACCCCATGGCCGTGTTCTCTCCAAATGAAATGAACTTCCTTAT<br>ATAGAGGAAGGGTCAAATATATATTATGACTCCTTAATG-3'          |
| pCAM-NRS1pm-F     | 5'-ATCGAAGCTTGCTGGTAGCTCACATGACGGGGTTTTTTTT-3'                                                        |
| pCAM-NRS1pm-R     | 5'-ACCCCATGGCCGTGTTCTCTCCAAATGAAATGAACTTCCTTAT<br>ATAGAGGAAGGGTCCAGCCAAATATATATTATGACTCCTTAATG<br>-3' |
| pCAM-NRS2p+-F     | 5'-ATCGAAGCTTGAATCTAAGGGAGACTGTTCTTAC-3'                                                              |
| pCAM-NRS2p+-R     | 5'-ACCCCATGGCCGTGTTCTCTCCAAATGAAATGAACTTCCTTAT<br>ATAGAGGAAGGGTGATTTCGTAGAAGAAGAAAGGTG-3'             |
| pCAM-NRS2p--F     | 5'-ATCGAAGCTTTAAGGGAGACTGTTCTTACACAAG-3'                                                              |
| pCAM-NRS2p--R     | 5'-ACCCCATGGCCGTGTTCTCTCCAAATGAAATGAACTTCCTTAT<br>ATAGAGGAAGGGGTGTAGAAGAAGAAAGGTGGAACC-3'             |
| pCAM-NRS2pm-F     | 5'-ATCGAAGCTTTCCGATAAGGGAGACTGTTCTTAC-3'                                                              |
| pCAM-NRS2pm-R     | 5'-ACCCCATGGCCGTGTTCTCTCCAAATGAAATGAACTTCCTTAT<br>ATAGAGGAAGGGTTCGGAGTAGAAGAAGAAAGGTGGAACCA<br>-3'    |
| pCAM-MYBp+-F      | 5'-ATCGAAGCTTGGATATTTTTTTTTTGTGCATCGTG-3'                                                             |
| pCAM-MYBp+-R      | 5'-ACCCCATGGCCGTGTTCTCTCCAAATGAAATGAACTTCCTTAT<br>ATAGAGGAAGGGTTATCCGTTCAAATTATAGAACATG-3'            |
| pCAM-MYBp--F      | 5'-ATCGAAGCTTTTTTTTTTTTTGTGCATCGTGACGATA-3'                                                           |
| pCAM-MYBp--R      | 5'-ACCCCATGGCCGTGTTCTCTCCAAATGAAATGAACTTCCTTAT<br>ATAGAGGAAGGGGTGTTCAAATTATAGAACATGCCA-3'             |
| pCAM-MYBpm-F      | 5'-ATCGAAGCTTTTCGCTTTTTTTTTTGTGCATCGTGACG-3'                                                          |
| pCAM-MYBpm-R      | 5'-ACCCCATGGCCGTGTTCTCTCCAAATGAAATGAACTTCCTTAT<br>ATAGAGGAAGGGTGCGAAGTTCAAATTATAGAACATG-3'            |
| pCAM-NACRS-F      | 5'-AGCTTTCTTCTGTAAACACGCATGTGACCCCTCCTCTATATAAG<br>GAAGTTCATTTCAATTTGGAGAGAACACGGC-3'                 |
| pCAM-NACRS-R      | 5'-CATGGCCGTGTTCTCTCCAAATGAAATGAACTTCCTTATATAG<br>AGGAAGGGTACATGCGTGTTACAGAAGAA-3'                    |
| ChIP-AT2G21320-F1 | 5'-TCAGCTTAGCAAAGTACAC-3'                                                                             |
| ChIP-AT2G21320-R1 | 5'-ACATTTTTAGGAATATGTT-3'                                                                             |
| ChIP-AT2G21320-F2 | 5'-GAGAGATTTAGTGAGAGCTT-3'                                                                            |
| ChIP-AT2G21320-R2 | 5'-GCAGTGTCAAAAATGGTCTC-3'                                                                            |
| ChIP-AT2G21320-F3 | 5'-CTGGGTTAACATTTGCTTG-3'                                                                             |

---

---

|                   |                                                  |
|-------------------|--------------------------------------------------|
| ChIP-AT2G21320-R3 | 5'-CTGAAGTATCAATTGGAGC-3'                        |
| ChIP-AT2G31880-F1 | 5'-GTACAATTTAGCCCATTTTCAC-3'                     |
| ChIP-AT2G31880-R1 | 5'-ACTGAATTCTTACATAAGAT-3'                       |
| ChIP-AT2G31880-F2 | 5'-CATCCTCGTTAGCTATCTGG-3'                       |
| ChIP-AT2G31880-R2 | 5'-GTTCCATAGTGAGCCACCG-3'                        |
| ChIP-AT2G31880-F3 | 5'-CCGGTTTTGTAGAACCGGG-3'                        |
| ChIP-AT2G31880-R3 | 5'-GTTATGTTACACACACCTTC-3'                       |
| ChIP-AT3G13470-F1 | 5'-CTAAAAGCAAATCATTAAAG-3'                       |
| ChIP-AT3G13470-R1 | 5'-TTAGA ACTCTCTAGA ACGT-3'                      |
| ChIP-AT3G13470-F2 | 5'-TTTCTTCTATAAATTTACC-3'                        |
| ChIP-AT3G13470-R2 | 5'-CGATCTTAAAATGTTTTTAT-3'                       |
| ChIP-AT3G13470-F3 | 5'-GAAGACTATAGACCGTGTG-3'                        |
| ChIP-AT3G13470-R3 | 5'-TTTTTAAAGATATTTCAATG-3'                       |
| pGAD-ANAC074-F    | 5'-CAGAGTGGCCATTATGGCCC-ATGGGTTTGAAAGATATTG-3'   |
| pGAD-ANAC074-R    | 5'-GAGGCCGAGGCGGCCGACATG-TCATTGGAAAGCGAGGATA-3'  |
| pGAD-AT3G44350-F  | 5'-CAGAGTGGCCATTATGGCCC-ATGGGAGAAGAGCTTTCTG-3'   |
| pGAD-AT3G44350-R  | 5'-GAGGCCGAGGCGGCCGACATG-TTAAGACCAATTCATTG-3'    |
| pGAD-AT2G33480-F  | 5'-CAGAGTGGCCATTATGGCCC-ATGGAGAAGAGGAGCTC-3'     |
| pGAD-AT2G33480-R  | 5'-GAGGCCGAGGCGGCCGACATG-CTATAGAAACAAACAAAAC-3'  |
| pGAD-AT3G56520-F  | 5'-CAGAGTGGCCATTATGGCCC-ATGGAGCCAACACACAG-3'     |
| pGAD-AT3G56520-R  | 5'-GAGGCCGAGGCGGCCGACATG-CTATTCGGATTCGGAATC-3'   |
| pGAD-AT3G04420-F  | 5'-CAGAGTGGCCATTATGGCCC-ATGGAGAATCCGGTGGG-3'     |
| pGAD-AT3G04420-R  | 5'-GAGGCCGAGGCGGCCGACATG-TTATGTTCTTGAGATAGAAG-3' |
| pGAD-AT4G01540-F  | 5'-CAGAGTGGCCATTATGGCCC-ATGATGAAAGGTCTGATTGG-3'  |

---

---

|                      |                                                        |
|----------------------|--------------------------------------------------------|
| pGAD-AT4G01540-<br>R | 5'-GAGGCCGAGGCGGCCGACATG-TCATAACTTCTTCACCGG-3'         |
| pGAD-AT2G43000-F     | 5'-CAGAGTGGCCATTATGGCCC-ATGAGTGGCGAAGGTAAC-3'          |
| pGAD-AT2G43000-<br>R | 5'-GAGGCCGAGGCGGCCGACATG-CTAGGGTTTAGTGTTGCC-3'         |
| pGAD-AT5G50820-F     | 5'-CAGAGTGGCCATTATGGCCC-ATGGACATTTCTGCGCAG-3'          |
| pGAD-AT5G50820-<br>R | 5'-GAGGCCGAGGCGGCCGACATG-TCACCGGCTTTGAATAAC-3'         |
| pGAD-AT1G69490-F     | 5'-CAGAGTGGCCATTATGGCCC-ATGGAAGTAACTTCCCAATC-3'        |
| pGAD-AT1G69490-<br>R | 5'-GAGGCCGAGGCGGCCGACATG-CTAAAAC TTAAACATCGCTT<br>G-3' |
| pGAD-AT1G77450-F     | 5'-CAGAGTGGCCATTATGGCCC-ATGATGAAATCTGGGGCTG-3'         |
| pGAD-AT1G77450-<br>R | 5'-GAGGCCGAGGCGGCCGACATG-TCAGAAAGTTCCCTGCC-3'          |
| pGAD-AT4G28500-F     | 5'-CAGAGTGGCCATTATGGCCC-ATGACTTGGTGCAATGAC-3'          |
| pGAD-AT4G28500-<br>R | 5'-GAGGCCGAGGCGGCCGACATG-TTAAGGGATAAAAGGTTG-3'         |

---
